# Supplementary material
Source: PubMed Central journal article supplement (PMC4258435)

Figure 1: SVN and CV-N inhibit ZEBOV replication *in vitro*.

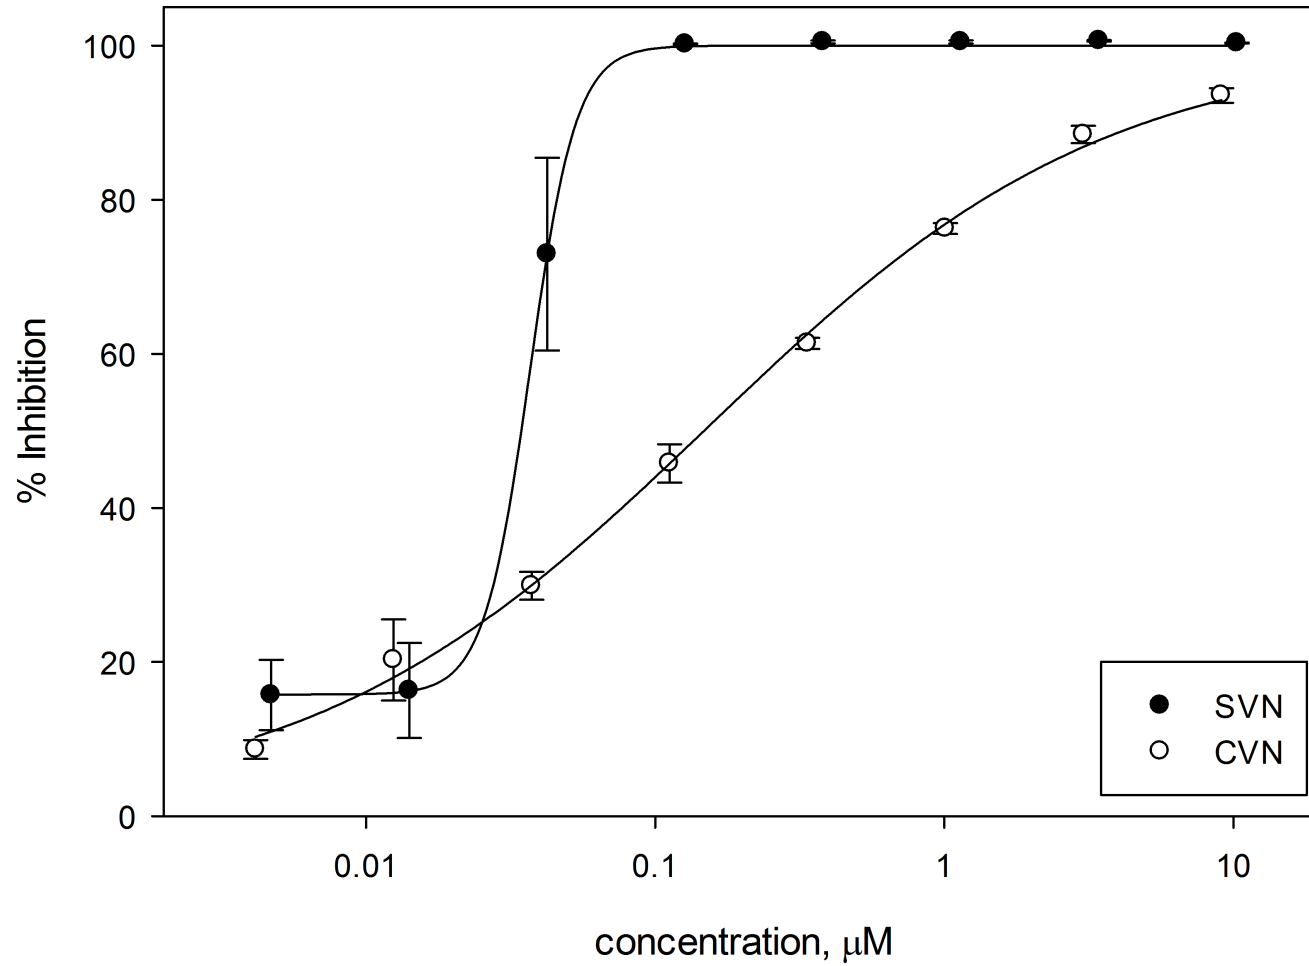

Figure 2: SVN binds to the mucin-rich region of ZEBOV GP1.

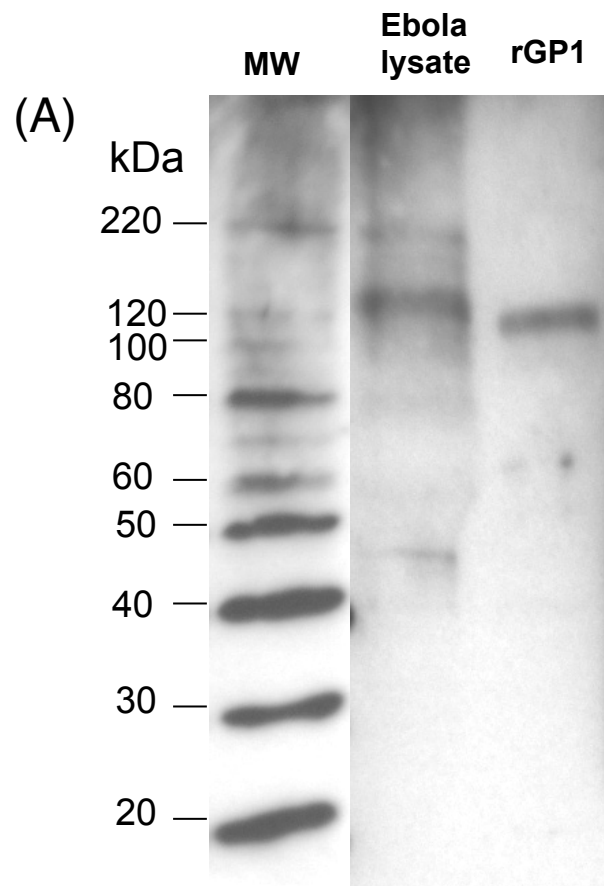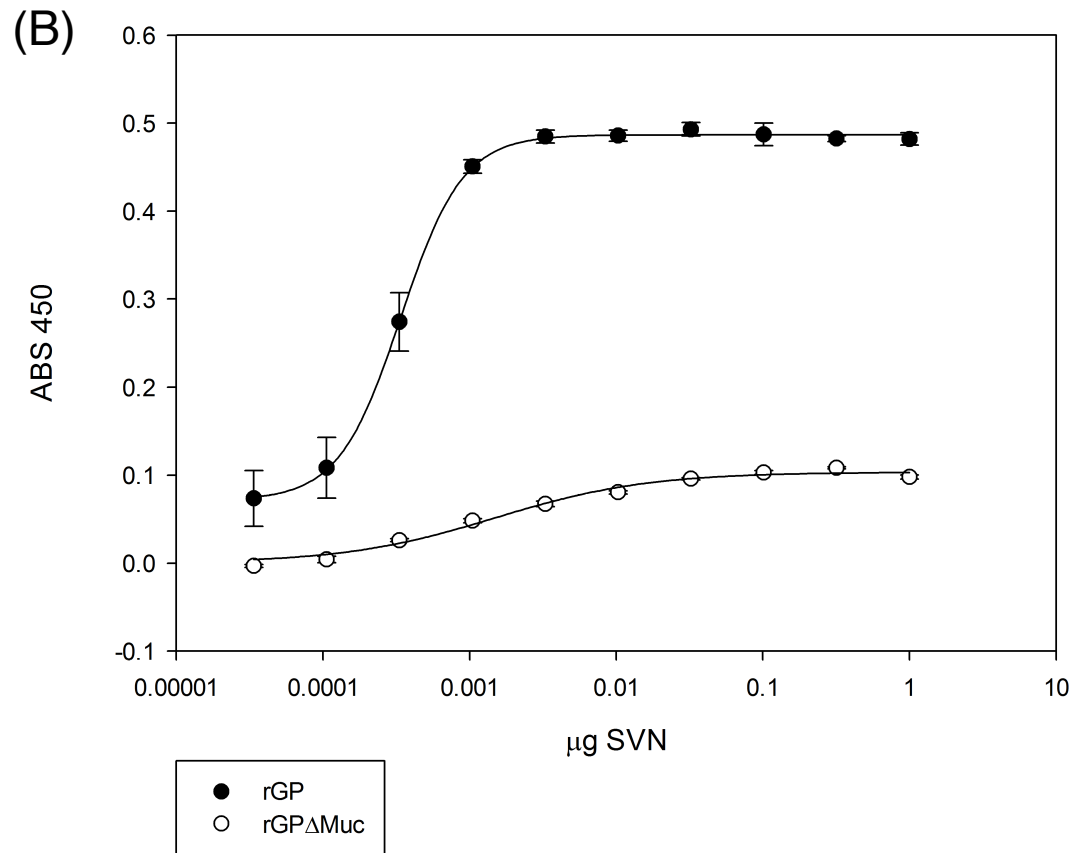

Figure 3: SVN has a relatively short serum half-life in mice.

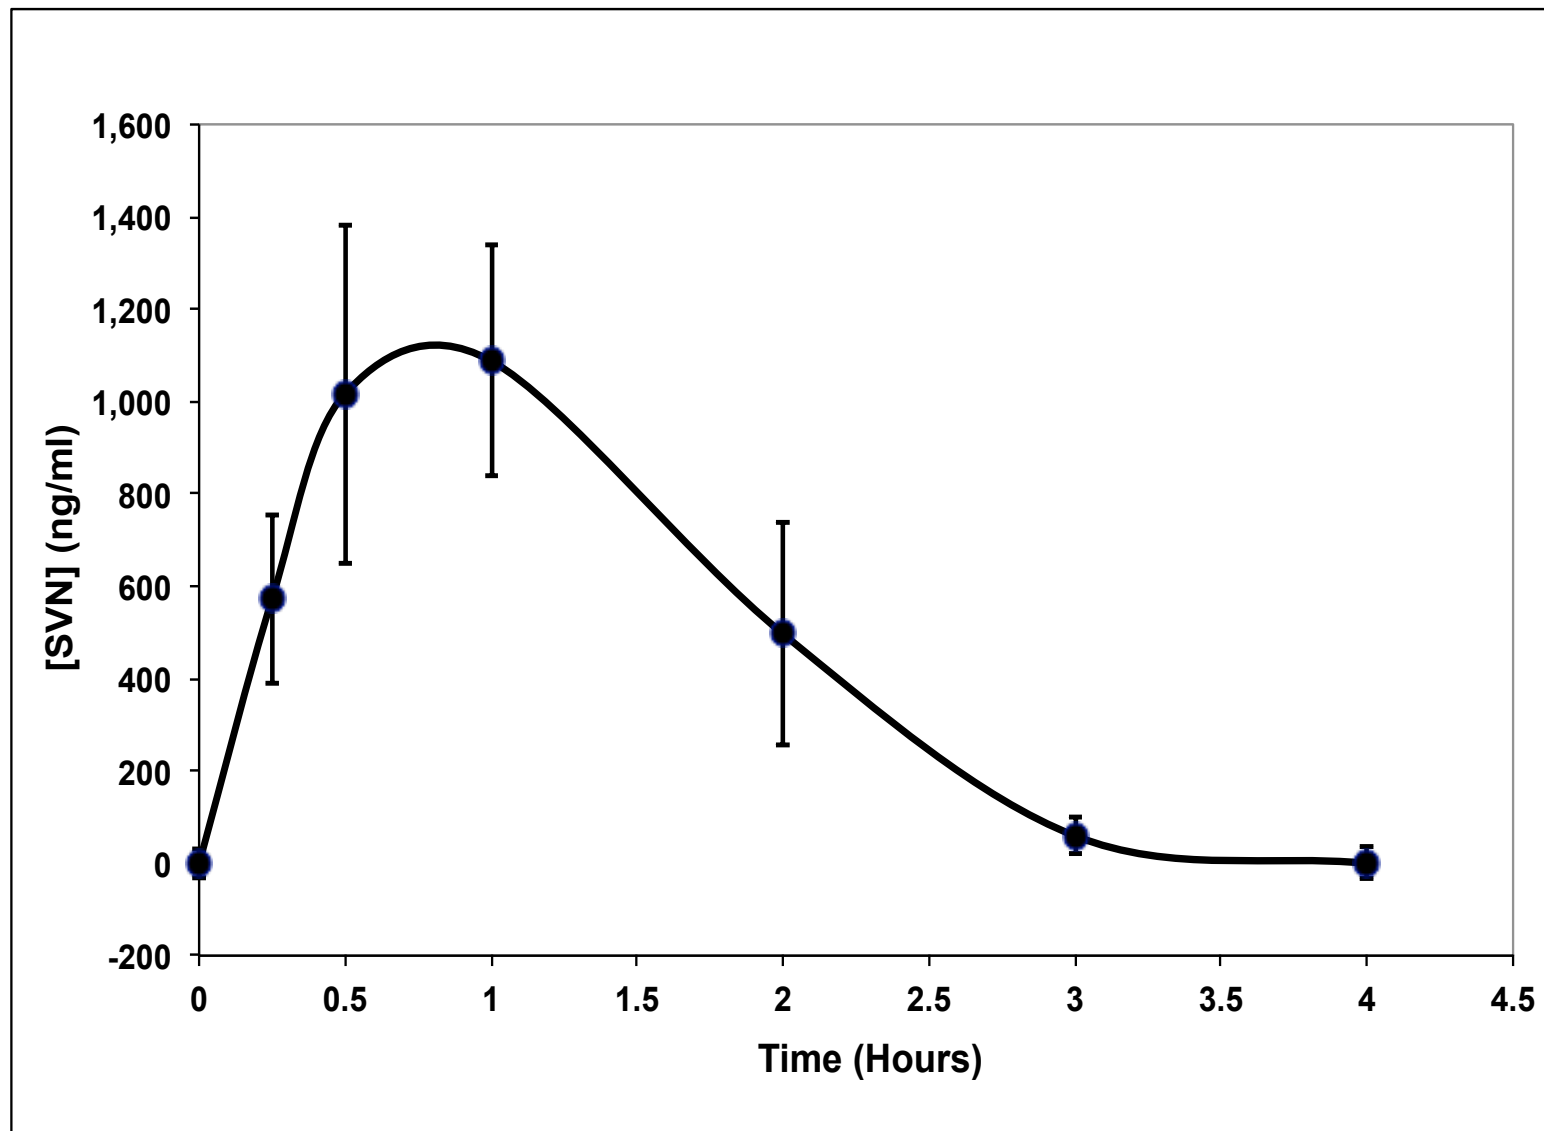

Figure 4: SVN treatment protects mice when begun prior to virus challenge.

A. Percent Survival

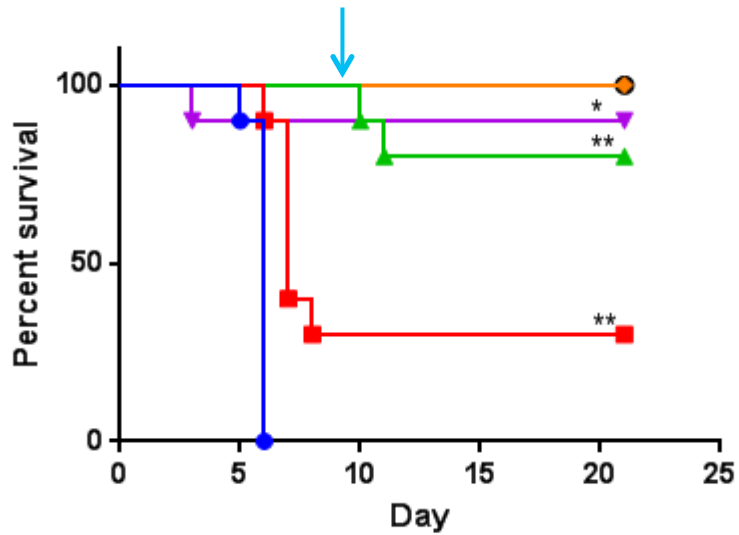

B. Percent Weight Change

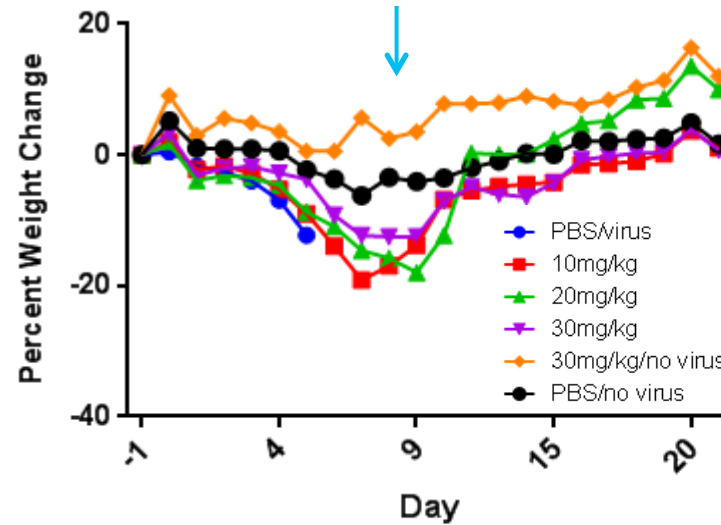

Figure 5: SVN treatment protects mice when begun before or after virus challenge.

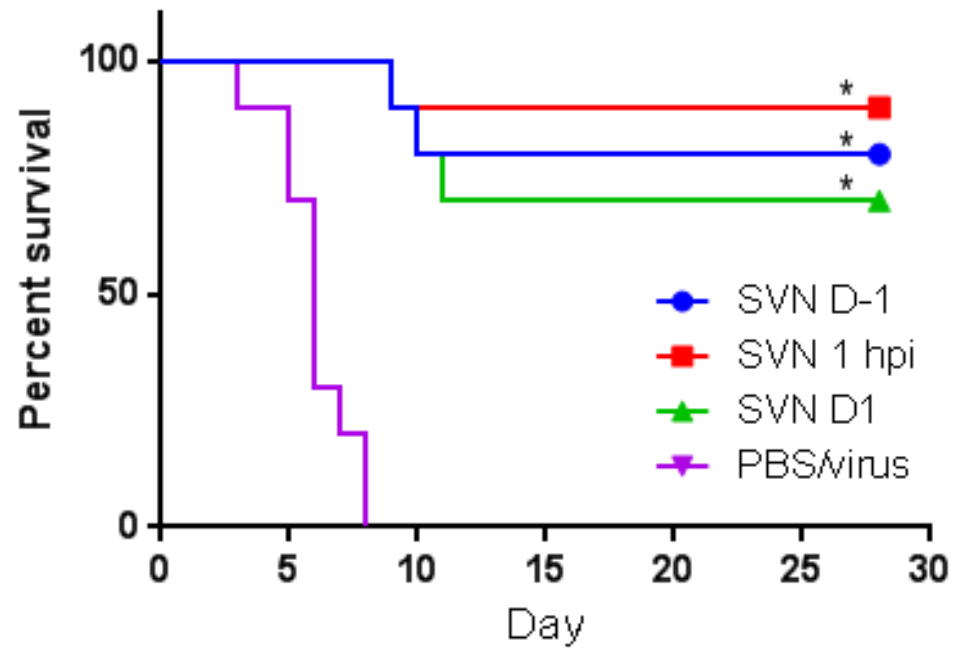

Figure 6: SVN treatment reduces titers of infectious virus and viral RNA in serum and tissues.

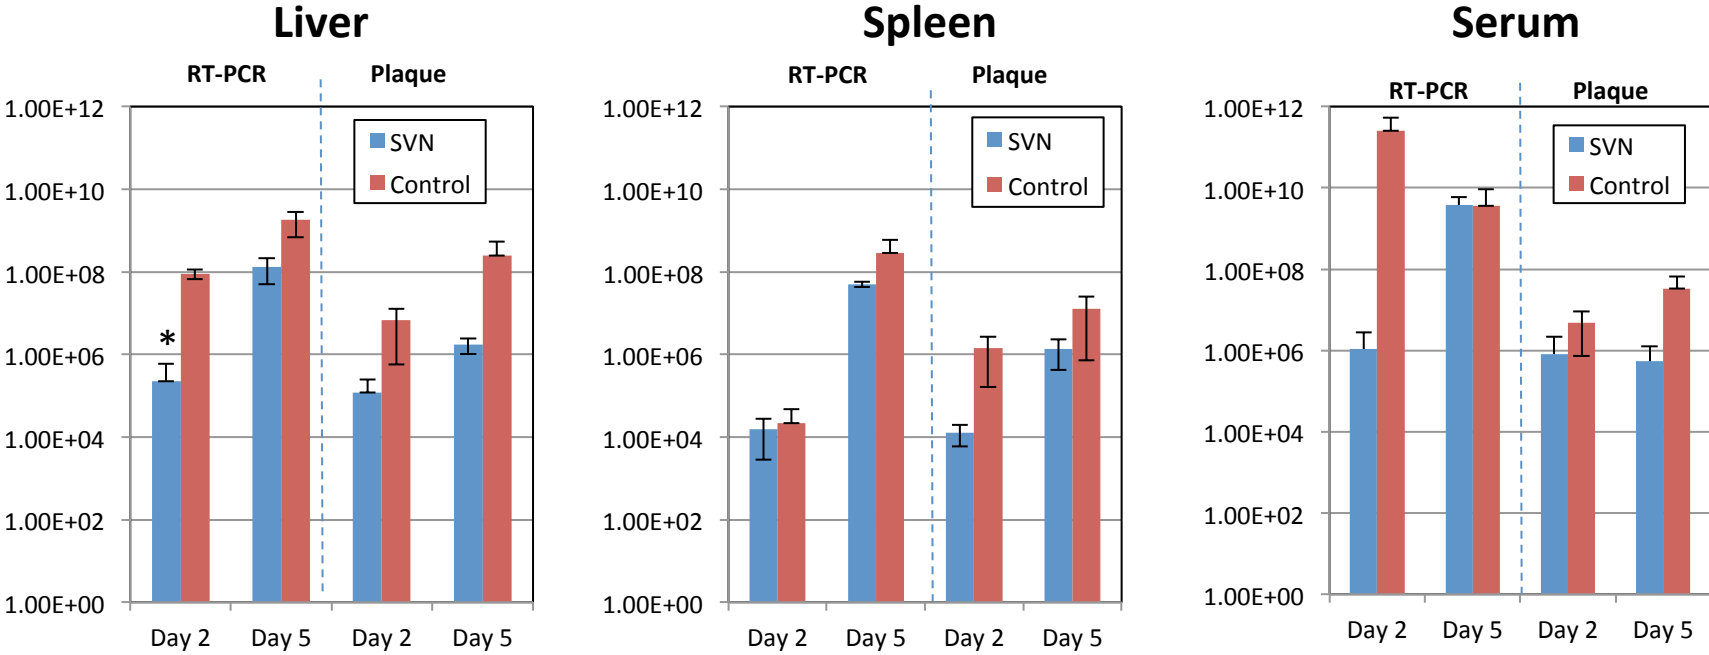

Figure S1: SVN displays *in vitro* inhibitory activity against marburgvirus.

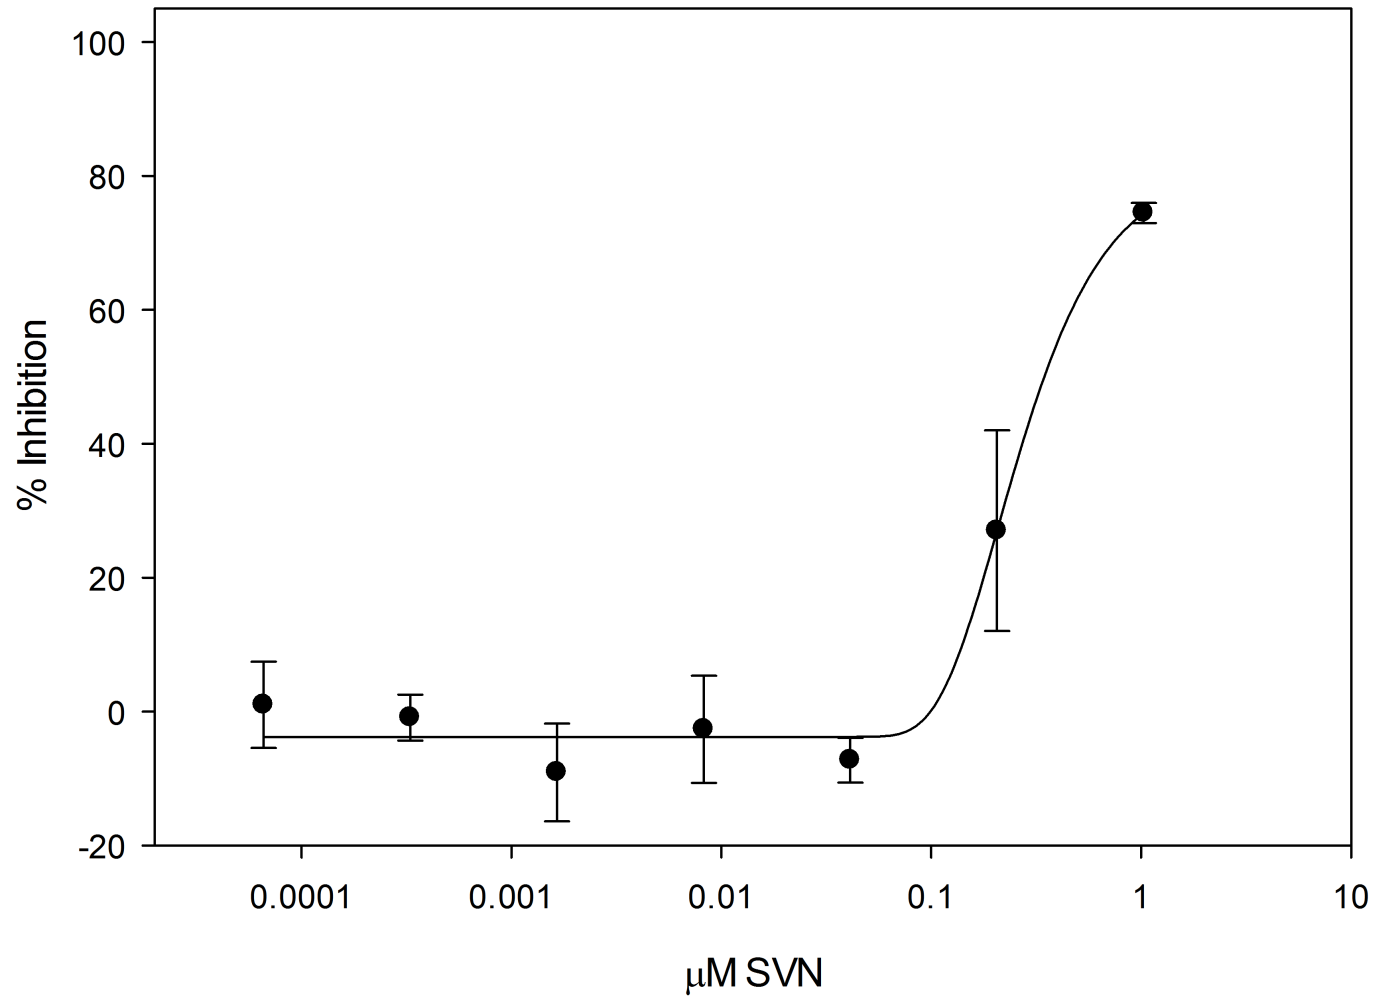

Figure S2: SVN shows no cytotoxicity for Vero E6 cells.

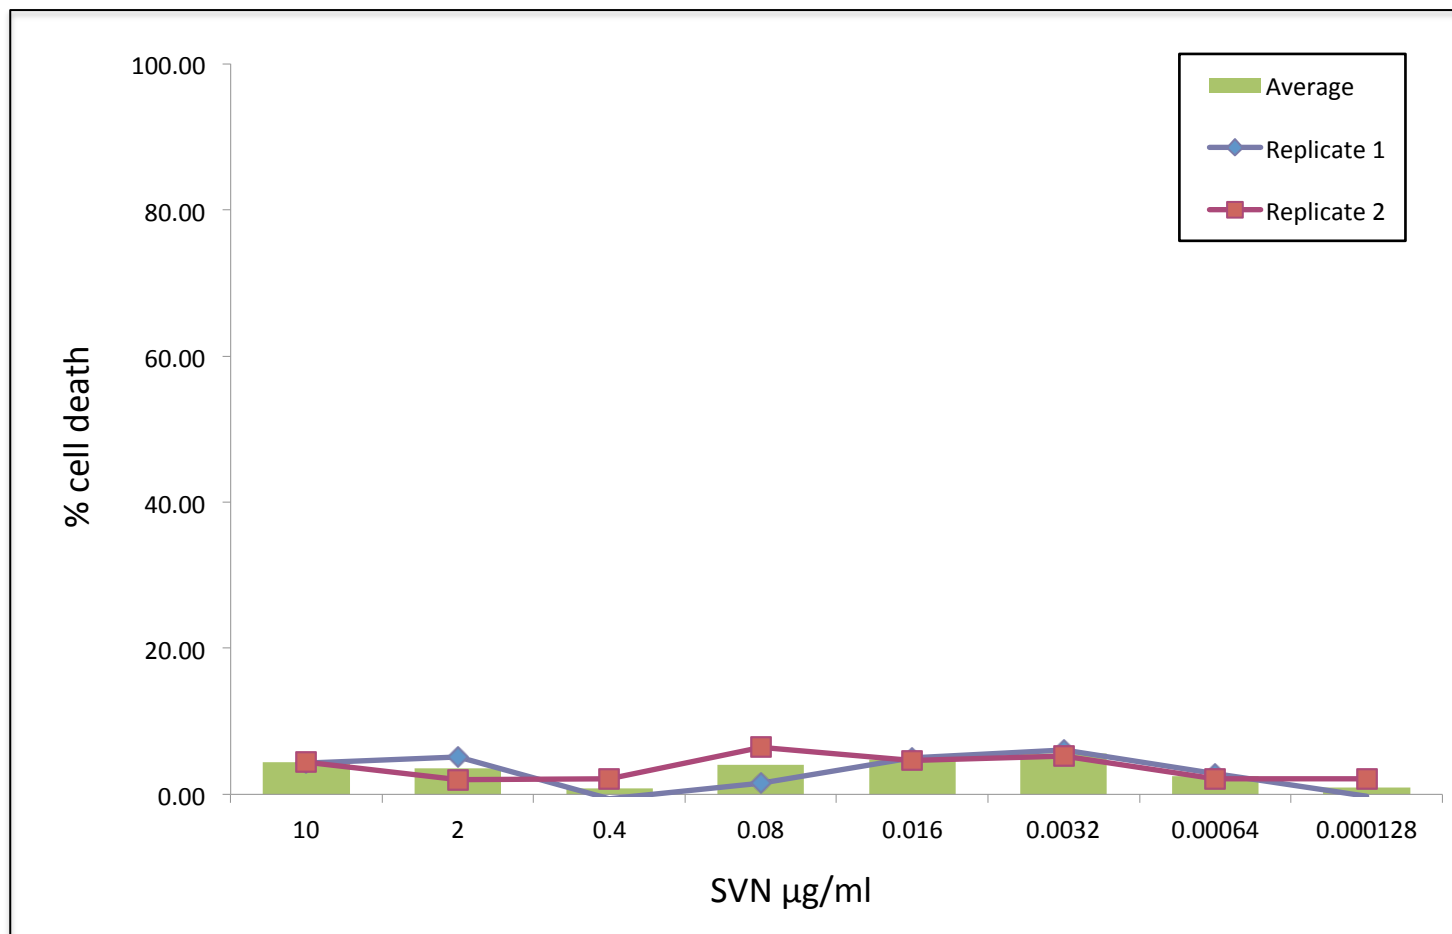



Figure S3: ZEBOV-infected mice treated with SVN have minimal tissue injury.

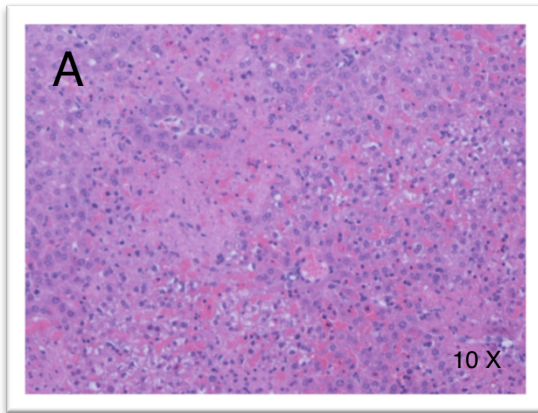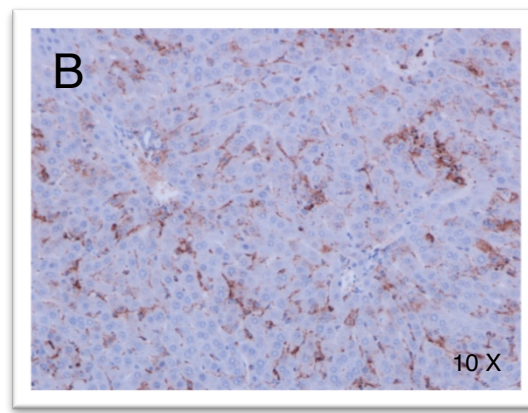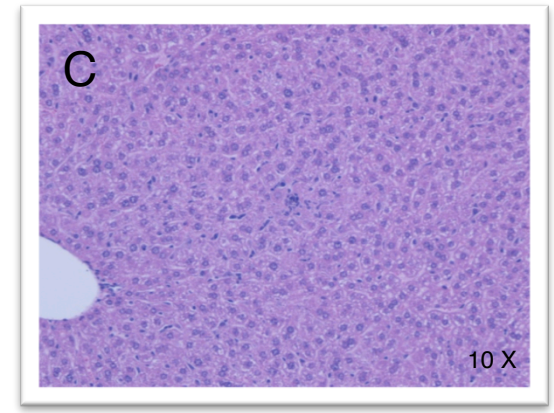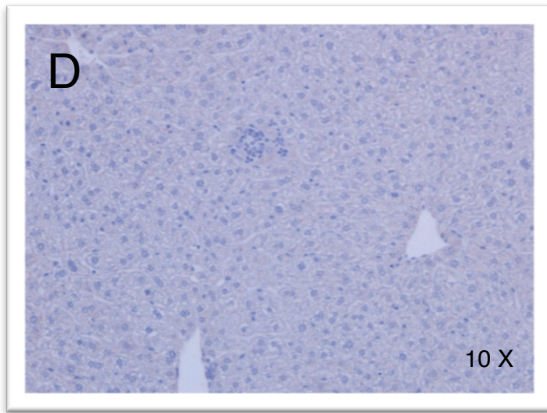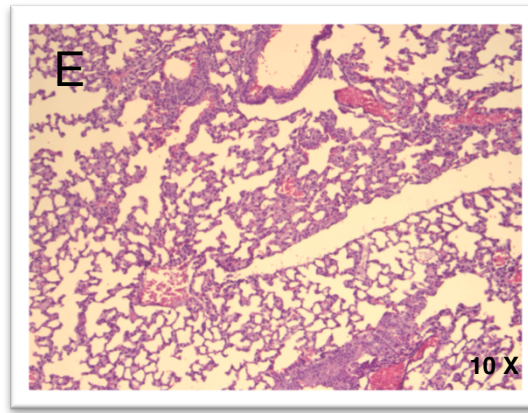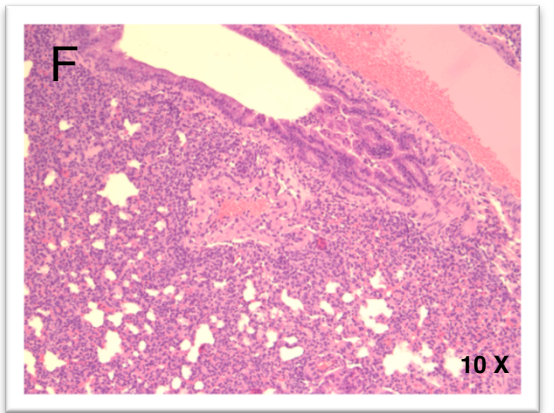

Supplement: NIHMS636173-supplement.pdf [file NIHMS636173-supplement.pdf]
